# Supplementary material for: Mebendazole stimulates CD14+ myeloid cells to enhance T-cell activation and tumour cell killing
Source: PubMed Central journal article supplement (PMC6089388; doi:10.18632/oncotarget.25713), 2018-07-20
Supplement: oncotarget-09-30805-s001.pdf [file oncotarget-09-30805-s001.pdf]

## Mebendazole stimulates CD14+ myeloid cells to enhance T-cell activation and tumour cell killing

### SUPPLEMENTARY MATERIALS

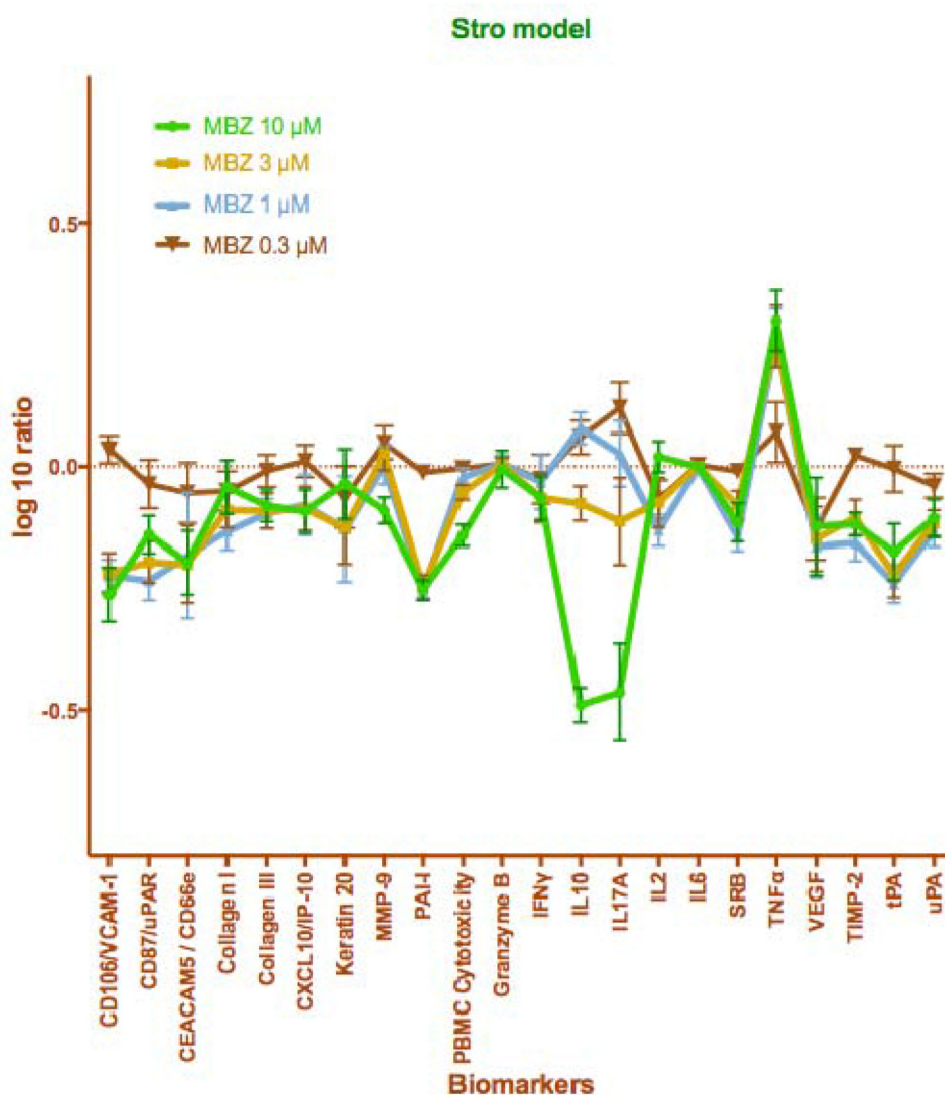

**Supplementary Figure 1: Biomarker profiles of MBZ, tested at multiple concentrations in 1 BioMAP systems, Stro model.** The biomarker readouts measured (see Methods) are indicated along the x-axis. The y-axis shows the log<sub>10</sub> expression ratios of the readout level measurements relative to solvent (DMSO buffer) controls. Each datapoint represents a single well.

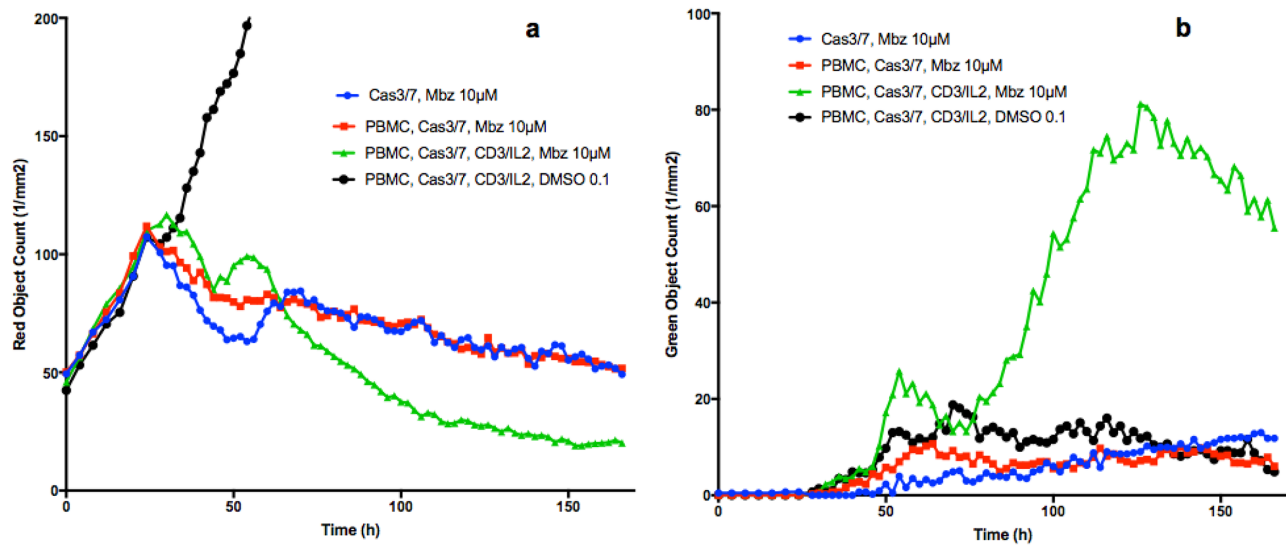

**Supplementary Figure 2: Co-culture of PBMC and red fluorescence-labeled A549 lung cancer cells in medium containing caspase 3/7 probe (Cas3/7).** The kinetics of changes in A549 cell survival (red object count) and apoptosis (green object count, cas3/7 positive cells) in response to anti-CD3/IL2 and MBZ (10  $\mu$ M) is presented in panel (a) and (b), respectively. Statistical analysis is presented in Supplementary Table 1.

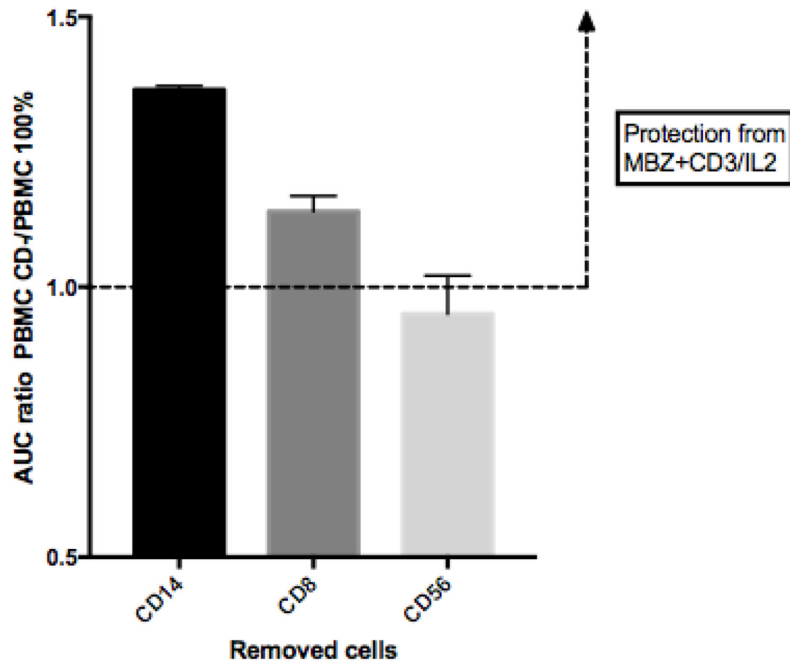

**Supplementary Figure 3: Effect of removal of CD14, CD8 and CD56 cells on MBZ induced A549Red cell kill in CD3/IL2 treated cells.** Results are presented as mean AUC ratios for depleted and intact PBMC cultures (n=2) treated with MBZ and antiCD3/IL2 as described in material and methods.

**Supplementary Table 1: Statistical analysis of the differences in AUC (MBZ 10  $\mu$ M)**

| <b>Object (AUC)</b> | <b>Comparison</b>                      | <b>Mean Difference</b> | <b>P-value</b> | <b>N</b> | <b>PVS<sup>1</sup></b> |
|---------------------|----------------------------------------|------------------------|----------------|----------|------------------------|
| <b>Red</b>          | DMSO+PBMC CD3/IL2 vs. MBZ+PBMC CD3/IL2 | 22912                  | 0.0005         | 6        | ***                    |
| <b>Red</b>          | MBZ+PBMC vs. MBZ+PBMC CD3/IL2          | 2645                   | 0.0007         | 6        | ***                    |
| <b>Red</b>          | MBZ vs. MBZ+PBMC CD3/IL2               | 2568                   | 0.0012         | 6        | **                     |
| <b>Green</b>        | DMSO+PBMC CD3/IL2 vs. MBZ+PBMC CD3/IL2 | 2696                   | 0.0246         | 5        | *                      |
| <b>Green</b>        | MBZ+PBMC vs. MBZ+PBMC CD3/IL2          | 4626                   | 0.0391         | 5        | *                      |
| <b>Green</b>        | MBZ vs. MBZ+PBMC CD3/IL2               | 4738                   | 0.0183         | 5        | *                      |

Data was analysed by two-tailed paired t test using Graphpad Prism. <sup>1</sup>P value summary.
